# Supplementary figures and images for: Investigating Ni nanoparticles on CeO2 for methane dissociation: a comparative study of theoretical calculations and experimental insights
Source: Royal Society of Chemistry journal article supplement (doi:10.1039/d4cp01324g), 2024-10-26

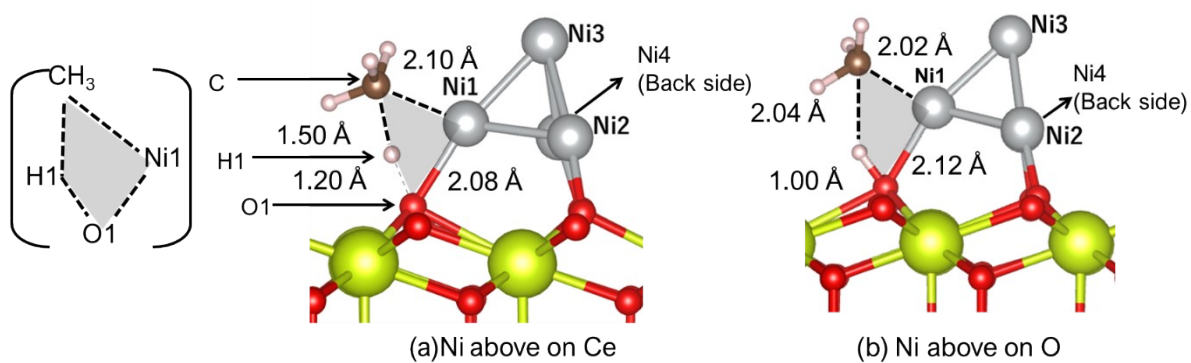

Figure S1 □ Dissociating methane and Ni clusters in the transition state (TS).

Supplement: d4cp01324g1.pdf [file d4cp01324g1.pdf]
